# Supplementary material for: Socioeconomic Status and Distance to Reference Centers for Complex Cancer Diseases: A Source of Health Inequalities? A Population Cohort Study Based on Catalonia (Spain)
Source: MDPI journal article supplement (doi:10.3390/ijerph19148814), 2022-07-20
Supplement: s1 [file s1]

Supplementary Material Table S1. Baseline characteristics of cohort by type of cancer and by sex

|                 |                           | Pancreas                      |      |                               |      |                     | Rectum                       |      |                             |      |                    |
|-----------------|---------------------------|-------------------------------|------|-------------------------------|------|---------------------|------------------------------|------|-----------------------------|------|--------------------|
|                 |                           | Men                           |      | Women                         |      | p                   | Men                          |      | Women                       |      | p                  |
|                 |                           | n                             | %    | n                             | %    |                     | n                            | %    | n                           | %    |                    |
| Age, years      | Median (IQR)              | 68.0 (14.0)                   |      | 71.0 (16.0)                   |      | 0.001* <sup>1</sup> | 69.2 (16.3)                  |      | 71.3 (17.6)                 |      | 0.128 <sup>1</sup> |
| Age, categories | < 60 years                | 94                            | 24,8 | 47                            | 17,6 | 0.002*              | 205                          | 21,6 | 106                         | 20,9 | 0,226              |
|                 | 60 - 69 years             | 128                           | 33,8 | 78                            | 29,2 |                     | 286                          | 30,2 | 137                         | 27,0 |                    |
|                 | 70 - 79 years             | 128                           | 33,8 | 99                            | 37,1 |                     | 299                          | 31,6 | 160                         | 31,5 |                    |
|                 | >= 80 years               | 29                            | 7,7  | 43                            | 16,1 |                     | 157                          | 16,6 | 105                         | 20,7 |                    |
| ASA             | ASA I                     | 6                             | 1,6  | 11                            | 4,1  | 0,300               | 57                           | 6,0  | 32                          | 6,3  | 0.043*             |
|                 | ASA II                    | 99                            | 26,1 | 69                            | 25,8 |                     | 462                          | 48,8 | 276                         | 54,3 |                    |
|                 | ASA III                   | 99                            | 26,1 | 63                            | 23,6 |                     | 338                          | 35,7 | 148                         | 29,1 |                    |
|                 | ASA IV                    | 9                             | 2,4  | 4                             | 1,5  |                     | 36                           | 3,8  | 13                          | 2,6  |                    |
|                 | Missing                   | 166                           | 43,8 | 120                           | 44,9 |                     | 54                           | 5,7  | 39                          | 7,7  |                    |
| TNM staging     | 0/I                       | 40                            | 10,6 | 23                            | 8,6  | 0,901               | 123                          | 13,0 | 78                          | 15,4 | 0,145              |
|                 | II                        | 151                           | 39,8 | 105                           | 39,3 |                     | 234                          | 24,7 | 100                         | 19,7 |                    |
|                 | III                       | 13                            | 3,4  | 11                            | 4,1  |                     | 490                          | 51,7 | 271                         | 53,3 |                    |
|                 | IV                        | 6                             | 1,6  | 3                             | 1,1  |                     | 88                           | 9,3  | 48                          | 9,4  |                    |
|                 | non-stageable             | 67                            | 17,7 | 54                            | 20,2 |                     | 12                           | 1,3  | 11                          | 2,2  |                    |
|                 | Missing                   | 102                           | 26,9 | 71                            | 26,6 |                     |                              |      |                             |      |                    |
| Income          | High and medium           | 125                           | 33,0 | 40                            | 15,0 | <0.001*             | 283                          | 29,9 | 96                          | 18,9 | <0.001*            |
|                 | Low                       | 245                           | 64,6 | 217                           | 81,3 |                     | 621                          | 65,6 | 385                         | 75,8 |                    |
|                 | Very low                  | 9                             | 2,4  | 10                            | 3,7  |                     | 43                           | 4,5  | 27                          | 5,3  |                    |
| Distance, Km    | Median (IQR)<br>min - max | 7,76 (33,21)<br>0,53 - 246,07 |      | 5,94 (32,01)<br>0,63 - 191,10 |      | 0.635 <sup>1</sup>  | 4,43 (8,51)<br>0,39 - 134,86 |      | 4,28 (9,52)<br>0,19 - 64,04 |      | 0.460 <sup>1</sup> |
| Distance, cat   | 0 - 10 km                 | 221                           | 58,3 | 159                           | 59,6 | 0,952               | 676                          | 71,4 | 364                         | 71,7 | 0,587              |
|                 | >10 km - <P90             | 120                           | 31,7 | 82                            | 30,7 |                     | 183                          | 19,3 | 90                          | 17,7 |                    |

|                                  |                        |     |      |     |      |       |     |      |     |      |       |
|----------------------------------|------------------------|-----|------|-----|------|-------|-----|------|-----|------|-------|
|                                  | >= P90                 | 38  | 10,0 | 26  | 9,7  |       | 88  | 9,3  | 54  | 10,6 |       |
| Intermediate centre <sup>2</sup> | Intermediate centre    | 165 | 43,5 | 108 | 40,4 | 0,434 | 112 | 11,8 | 71  | 14,0 | 0,239 |
|                                  | Reference centre<br>RC | 214 | 56,5 | 159 | 59,6 |       | 835 | 88,2 | 437 | 86,0 |       |
| Total patients                   |                        | 379 | 58,7 | 267 | 41,3 |       | 947 | 65,1 | 508 | 34,9 |       |

Distance: km between the residential location of patients and centre of surgery

P90 distance: ancreatic cancer=89,14Km, Rectal cancer=29,70Km.

1. U Mann-Whitney test for median comparison

2. Intermediate centre ( The proximity centre close to residential location is not the RC for sugery ) / 1. RC ( The proximity centre is the RC for surgery)

IQR: Interquartile range

Missing: no data found

P values below 0.05 (two-sided) were considered to indicate statistical significance.

\* Chi-square test
