# Supplementary material for: Socioeconomic Status and Distance to Reference Centers for Complex Cancer Diseases: A Source of Health Inequalities? A Population Cohort Study Based on Catalonia (Spain)
Source: MDPI journal article supplement (doi:10.3390/ijerph19148814), 2022-07-20
Supplement: s1 [file s1]

Supplementary Material Table S2. Description of distance by age, stage, income and pathology

|                 |                 | Pancreas |       |                      | Rectum |       |                      |
|-----------------|-----------------|----------|-------|----------------------|--------|-------|----------------------|
|                 |                 | Median   | (IQR) | p1                   | Median | (IQR) | p1                   |
| Age, categories |                 |          |       | 0,383                |        |       | 0.019 <sup>*,1</sup> |
|                 | < 60 years      | 6,68     | 32,51 |                      | 5,63   | 9,85  |                      |
|                 | 60 - 69 years   | 8,59     | 40,06 |                      | 4,45   | 8,48  |                      |
|                 | 70 - 79 years   | 7,03     | 31,17 |                      | 4,21   | 9,07  |                      |
|                 | >= 80 years     | 4,88     | 19,86 |                      | 3,75   | 7,66  |                      |
| Stage           |                 |          |       | 0,209                |        |       | 0,118                |
|                 | 0/I             | 5,24     | 9,02  |                      | 3,76   | 7,63  |                      |
|                 | II              | 7,95     | 32,99 |                      | 4,18   | 7,99  |                      |
|                 | III             | 5,07     | 17,98 |                      | 4,47   | 9,27  |                      |
|                 | IV              | 5,54     | 3,17  |                      | 5,58   | 15,81 |                      |
|                 | non-stageable   | 7,63     | 34,24 |                      | 4,15   | 5,23  |                      |
|                 | Missing         | 7,76     | 40,30 |                      |        |       |                      |
| Income          |                 |          |       | 0.022 <sup>*,2</sup> |        |       | 0.038 <sup>*,3</sup> |
|                 | High and medium | 5,39     | 18,14 |                      | 3,94   | 7,44  |                      |
|                 | Low             | 8,26     | 35,68 |                      | 4,52   | 10,18 |                      |
|                 | Very low        | 6,42     | 9,77  |                      | 3,99   | 7,47  |                      |

P90 distance: ancreatic cancer=89,14Km, Rectal cancer=29,70Km.

p1. Kruskal–Wallis H test

1. U Mann-Whitney test for median comparison: statistical significant difference between categories >80 and <60 (p=0.015)

2. U Mann-Whitney test for median comparison: statistical significant difference between "High and Medium" and "Low" income categories (p=0.024)

3. U Mann-Whitney test for median comparison: statistical significant difference between "High and Medium" and "Low" income categories (p=0.032)

IQR: Interquartile range

Missing: no data found
